# Supplementary material
Source: PubMed Central journal article supplement (PMC8251917)
Supplement: HUMU-42-520-s002.pdf [file HUMU-42-520-s002.pdf]

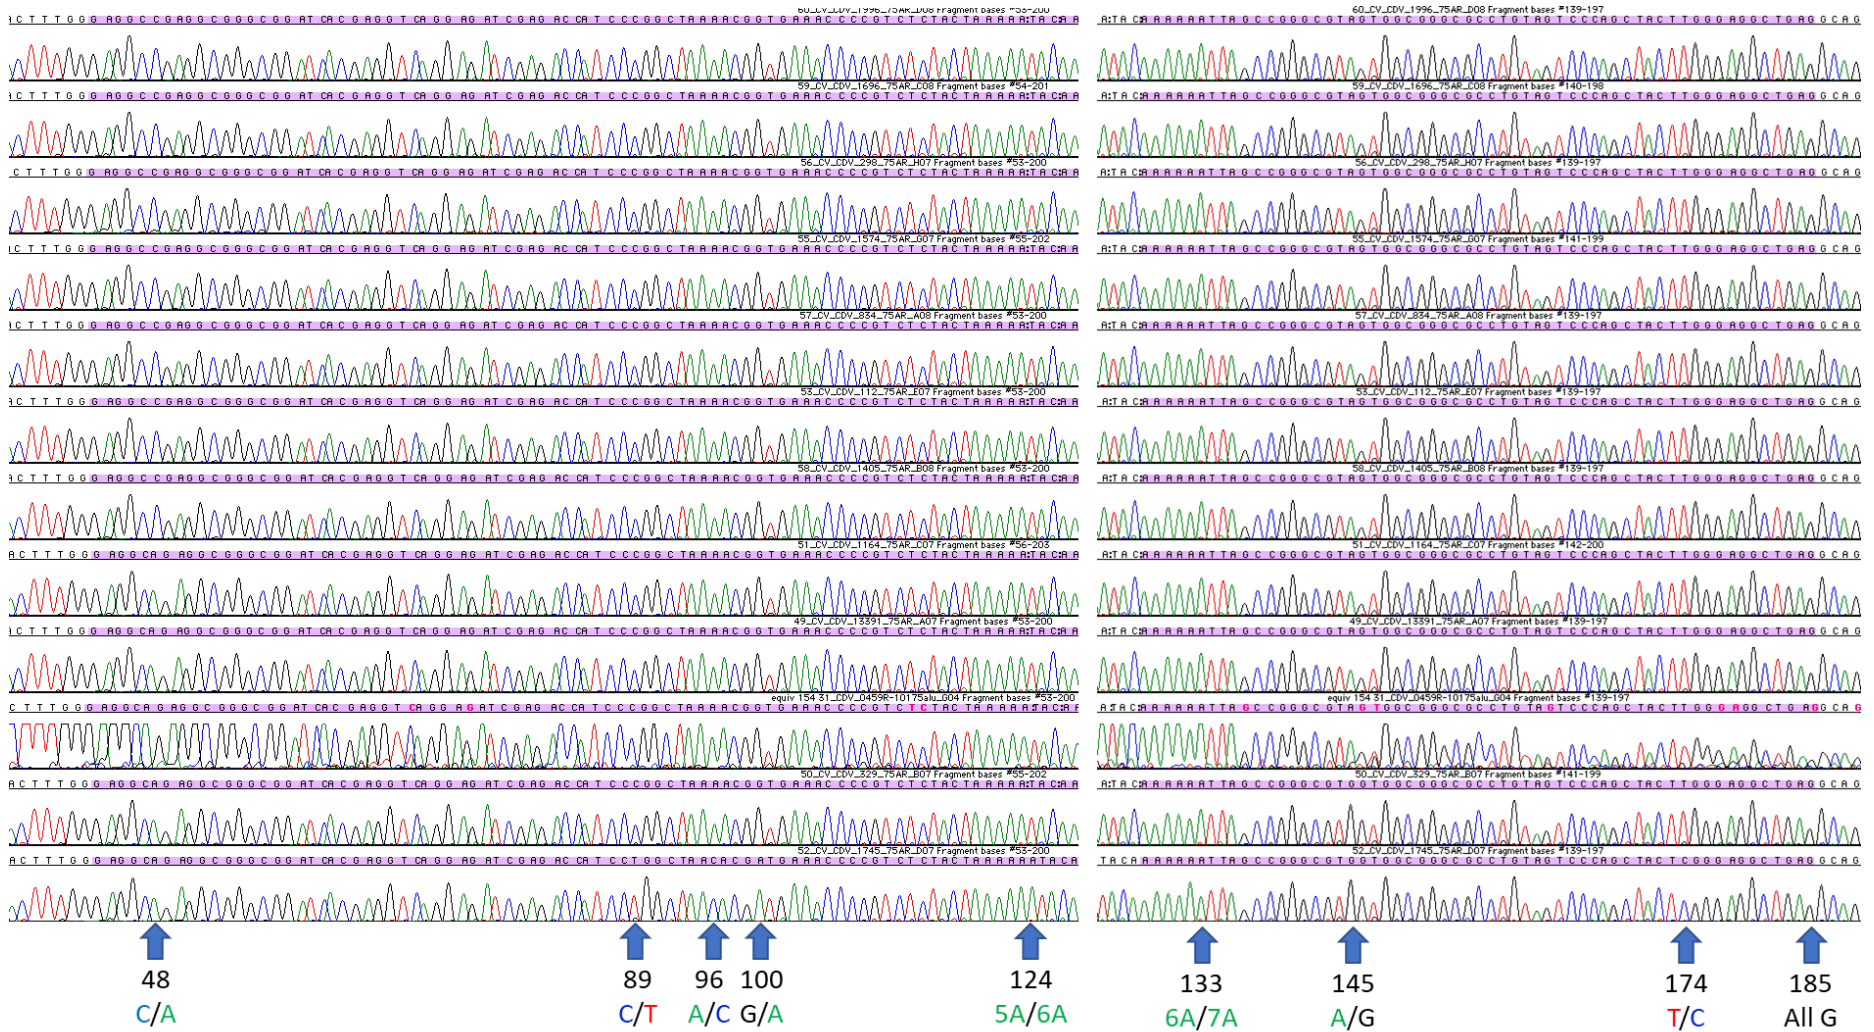

**Supplementary Figure S1.** Chromatograms showing the DNA sequences of 12 different VHL families that possess a “hotspot” deletion involving the *AluYa5* at chr3:10189995-10190297 and the *AluY* at chr3:10199822-1020013. The positions showing sequence differences between the two *Alus* are indicated.

UOB-2938 inserted DNA sequence:

**TTAGCCAGGC****GC****TGTGGAAGG****CGGTAA****GTCCCAGCTACT****CGGGAGGCTGA**  
**GGAGGAAGAA****TCGCTTGA****ACCAGGCAGCAGAGGTGGCGGTGCAGTGAGA**  
**TCACAGCCTT****CAC****TT****CAGCCTGGGTGATAGAGTGC****ACTCTGTCTCAAAA**  
**AAAAAAAAAA****TTCCACA****TATAAGT****GAGA****ACATGCAGTGGTACTTCTTTT**  
**TTTCTTTTTC****TTTCTTTTTTTTTTTGAGACGGAGTTT****CAC****TC****TTGTTGCCA**  
**AGAGGAGTGCAGC**

UOB-2952 inserted DNA sequence:

**TTGA****ACCAGGAGGCGGAGGT****TG****CAGTGAGCTGAGATCATG****TCACTGCAC**  
**TCC****TC****TTGGGCAACAAGAGT****GAAACTCCGTC****CAAAAAAAAAAAAAAGAAA**  
**GAAAAAGAAAAAAG****AAGATAAA****TACC****KGC****W****TK****TYK****CRS****TTATA****TGTGG**  
**AA****TTTTTTTTTTTTTTTTTTTTTTGAGACAGAGTCTCACTCTATCACCCAGGCT**  
**GAA****GTGCAGTGGCGTGATCTCAGCTCACCGCCACCTCTGCTGCCTGGGTT**  
**CAAGCGATTCTT**

**Supplementary Figure S2:** The unique Alu-like sequences that have been inserted at the breakpoints of the deletions in UOB-2938 and UOB-2952, respectively.

| Family ID | Deletion type | Additional deleted/partially deleted genes                                                           | Hg19 minimal deletion  | HGVS annotation                            | Minimal deletion size |
|-----------|---------------|------------------------------------------------------------------------------------------------------|------------------------|--------------------------------------------|-----------------------|
| UOB-3028  | CD            | CIDEC, JAGNI, IL17RE, CRELD1, PRRT3, PRRT3AS1, EMC3, EMC3-AS1, CICECP, FANCD2, FANCD2OS, BRK1, IRAK2 | chr3:9907355-10262669  | NC_000003.11:g.(?_9907355)_(10262669?)del  | 355,315 bp            |
| UOB-2951  | CD            | EMC3, EMC3-AS1, CICECP, FANCD2, FANCD2OS, BRK1                                                       | chr3:10048652-10193436 | NC_000003.11:g.(?_10048652)_(10193436?)del | 144,785 bp            |
| UOB-2965  | CD            | FANCD2, FANCD2OS, BRK1, IRAK2                                                                        | chr3:10068504-10208713 | NC_000003.11:g.(?_10068504)_(10208713?)del | 140,210 bp            |
| UOB-3853  | CD            | FANCD2, FANCD2OS, BRK1, IRAK2                                                                        | chr3:10081500-10260000 | NC_000003.11:g.(?_10081500)_(10260000?)del | 178,501 bp            |
| UOB-3097  | CD            | FANCD2, FANCD2OS, BRK1, IRAK2                                                                        | chr3:10092365-10260190 | NC_000003.11:g.(?_10092365)_(10260190?)del | 167,826 bp            |
| UOB-1296  | PD            | FANCD2, FANCD2OS, BRK1                                                                               | chr3:10095290-10183314 | NC_000003.11:g.(?_10095290)_(10183314?)del | 88,025 bp             |
| UOB-2989  | CD            | FANCD2, FANCD2OS, BRK1, IRAK2                                                                        | chr3:10140054-10212783 | NC_000003.11:g.(?_10140054)_(10212783?)del | 72,730 bp             |
| UOB-3109  | CD            | BRK1, IRAK2                                                                                          | chr3:10152535-10238737 | NC_000003.11:g.(?_10152535)_(10238737?)del | 86,203 bp             |
| UOB-1374  | CD            | IRAK2, TATDN2                                                                                        | chr3:10182693-10299403 | NC_000003.11:g.(?_10182693)_(10299403?)del | 116,711 bp            |
| UOB-1240  | CD            | IRAK2                                                                                                | chr3:10182963-10220230 | NC_000003.11:g.(?_10182963)_(10220230?)del | 37,268 bp             |
| UOB-1539  | PD            | IRAK2, TATDN2                                                                                        | chr3:10184329-10311500 | NC_000003.11:g.(?_10184329)_(10311500?)del | 127,172 bp            |
| UOB-1377  | PD            | IRAK2                                                                                                | chr3:10184329-10222357 | NC_000003.11:g.(?_10184329)_(10222357?)del | 38,029 bp             |
| UOB-1719  | PD            | IRAK2, TATDN2                                                                                        | chr3:10187494-10307963 | NC_000003.11:g.(?_10187494)_(10307963?)del | 120,470 bp            |

**Supplementary Table 1: aCGH-mapped *VHL* deletion sizes and locations**

PD – Partial Deletion, CD – Complete Deletion
